# Supplementary material for: Fungal–Algal Association Drives Lichens’ Mutualistic Symbiosis: A Case Study with Trebouxia-Related Lichens
Source: MDPI journal article supplement (doi:10.3390/plants12173172), 2023-09-04
Supplement: s1 [file s1]

| Marker            | Primer                     | Direction | Sequence (5'→3')                                             | Annealing temperature (°C) | Reference |
|-------------------|----------------------------|-----------|--------------------------------------------------------------|----------------------------|-----------|
| Mycobiont         |                            |           |                                                              |                            |           |
| ITS               | ITS4                       | Forward   | TCCTCCGCTTATTGATATGC                                         | 55-60                      | [68]      |
|                   | ITS5                       | Reverse   | GGAAGTAAAAGTCGTAACAAGG                                       |                            |           |
| LSU               | LROR                       | Forward   | ACCCGCTGAACTTAAGC                                            | 55-60                      | [67]      |
|                   | LR5                        | Forward   | ATCCTGAGGGAAACTTC                                            |                            |           |
| nu-LSU-155-5      |                            | Reverse   | GGGTCCGAGTTGTAATTTGT                                         | 52                         | [57]      |
|                   | mrSSU1                     | Forward   | AGCAGTGAGGAATATTGGTC'                                        |                            |           |
| MtSSU             | mrSSU3R                    | Reverse   | ATGTGGCACGTCTATAGCCC                                         | 56                         | [69]      |
|                   | gRPB1-A                    | Forward   | GA(G/T)TGTCC(T/G)GG(A/T)CATTTTG<br>G                         |                            |           |
| RPB1              | fRPB-C                     | Revers    | C(A/C/G/T)GC(A/T/G)AT(A/C/G/T)TC(A<br>/G)TT(A/G)TCCAT(A/G)TA | 55-50 (Touch<br>down)      | [60]      |
|                   | RPB1-HETER-F               | Forward   | CGGACCCATATCAAGCTGTT                                         |                            |           |
| RPB1-HETER-R      |                            | Reverse   | TGTCGCTACGTGAAATTGGA                                         | This study                 |           |
|                   | RPB1-Rh-F                  | Forward   | GCTTCATGACCAAAATCAAG                                         |                            |           |
| RPB1-Rh-R         |                            | Reverse   | GAAACTGCAGTAGTTGTTCG                                         |                            |           |
|                   | Photobiont                 |           |                                                              |                            |           |
| ITS               | nr-SSU-1780-59             | Forward   | CTGCGGAAGGATCATTGATTC                                        | 50                         | [63]      |
|                   | nr-LSU-0012-39             | Reverse   | AGTTCAGCGGGTGGTCTTG                                          |                            |           |
| AL1500bf          |                            | Forward   | GATGCATTCAACGAGCCTA                                          | 54                         | [59]      |
|                   | LR3                        | Reverse   | ACCTGCGGAAGGATCATT                                           |                            |           |
| a-ch-rbcL-203 (f) |                            | Forward   | GAATCWTCWACWGGWACTTGGAC<br>WAC                               | 50                         | [61]      |
|                   | a-ch-rbcL-991(r)           | Reverse   | CCTTCTARTTTACWACAAC                                          |                            |           |
| PRASFII           |                            | Forward   | ATGGTTCCACAAACAGAAAC                                         | 47                         | [62]      |
|                   | PRASR2                     | Reverse   | CAGTGAAACCACCAGTTAAATAG                                      |                            |           |
| CV1               |                            | Forward   | TACCTGGTTGATCCTGCCAGTAG                                      | 55                         | [64]      |
|                   | CV2                        | Reverse   | CCAATCCCTAGTCGGCATCGT                                        |                            |           |
| SSU               | a(treb)-nu-SSU-0078-5'-mpn | Forward   | CATGTCTAAGTATAAACTGCT                                        | 50                         | [56]      |
|                   | a(treb)-nu-SSU-0803-3'-mpn | Reverse   | TAGGCCAGAGTCCTATCGTGTTAT                                     |                            |           |

## References

56. Dal Grande, F.; Beck, A.; Cornejo, C.; Singh, G.; Cheenacharoen, S.; Nelsen, M.P.; Scheidegger, C. Molecular phylogeny and symbiotic selectivity of the green algal genus *Dictyochloropsis* s.l. (Trebouxiophyceae): a polyphyletic and widespread group forming photobiont-mediated guilds in the lichen family Lobariaceae. *New Phytol.* **2014**, *202*, 455–470, doi:10.1111/nph.12678.
57. Döring, H.; Clerc, P.; Grube, M.; Wedin, M. Mycobiont-specific PCR primers for the amplification of nuclear ITS and LSU rDNA from lichenized ascomycetes. *Lichenologist* **2000**, *32*, 200–204, doi:10.1017/S0024282900000207.
58. FRIEDL, T.; ROKITTA, C. Species relationships in the lichen alga *Trebouxia* (Chlorophyta, Trebouxiophyceae): molecular phylogenetic analyses of nuclear-encoded large subunit rRNA gene sequences. *Symbiosis* **1997**, *23*, 125-148.

59. Helms, G.; Friedl, T.; Rambold, G.; Mayrhofer, H. Identification of photobionts from the lichen family Physciaceae using algal-specific ITS rDNA sequencing. *Lichenologist* **2001**, *33*, 73–86, doi:10.3732/ajb.89.4.688.
60. Matheny, P.B.; Liu, Y.J.; Ammirati, J.F.; Hall, B.D. Using RPB1 sequences to improve phylogenetic inference among mushrooms (Inocybe, Agaricales). *Am. J. Bot.* **2002**, *89*, 688–698.
61. Nelsen, M.P.; Plata, E.R.; Andrew, C.J.; Lücking, R.; Lumbsch, H.T. PHYLOGENETIC DIVERSITY OF TRENTAPOHLIALEAN ALGAE ASSOCIATED WITH LICHEN-FORMING FUNGI 1. *J. Phycol.* **2011**, *47*, 282–290, doi:10.1111/j.1529-8817.2011.00962.x.
62. Nozaki, H.; Itoh, M.; Sano, R.; Uchida, H.; Watanabe, M.M.; Kuroiwa, T. Phylogenetic relationships within the colonial Volvocales (Chlorophyta) inferred from rbcL gene sequence data. *J. Phycol.* **1995**, *31*, 970–979, doi:10.1111/j.0022-3646.1995.00970.x.
63. Piercey-Normore, M.D.; DePriest, P.T. Algal switching among lichen symbioses. *Am. J. Bot.* **2001**, *88*, 1490–1498, doi:10.2307/3558457.
64. Sawayama, S.; Inoue, S.; Yokoyama, S.y. Phylogenetic position of *Botryococcus braunii* (Chlorophyceae) based on small subunit ribosomal RNA sequence data 1. *J. Phycol.* **1995**, *31*, 419–420, doi:10.1111/j.0022-3646.1995.00419.x.
65. Sherwood, A.R.; Garbary, D.J.; Sheath, R.G. Assessing the phylogenetic position of the Prasiolales (Chlorophyta) using rbc L and 18S rRNA gene sequence data. *Phycologia* **2000**, *39*, 139–146, doi:10.2216/i0031-8884-39-2-139.1.
66. Stiller, J.W.; Hall, B.D. The origin of red algae: implications for plastid evolution. *Proc. Natl. Acad. Sci. U.S.A.* **1997**, *94*, 4520–4525, doi:10.1073/pnas.94.9.4520.
67. Vilgalys, R.; Hester, M. Rapid genetic identification and mapping of enzymatically amplified ribosomal DNA from several *Cryptococcus* species. *J. Bacteriol.* **1990**, *172*, 4238–4246, doi:10.1128/jb.172.8.4238-4246.1990.
68. White, T.J.; Bruns, T.; Lee, S.; Taylor, J. Amplification and direct sequencing of fungal ribosomal RNA genes for phylogenetics. In *PCR Protocols: - A Guide to Methods and Applications*; White, T.J., Bruns, T., Lee, S., Eds.; Academic Press, 1990; pp. 315–322. doi:10.1016/B978-0-12-372180-8.50042-1.
69. Zoller, S.; Scheidegger, C.; Sperisen, C. PCR primers for the amplification of mitochondrial small subunit ribosomal DNA of lichen-forming Ascomycetes. *Lichenologist* **1999**, *31*, 511–516, doi:10.1006/lich.1999.0220.
